# Supplementary material for: Catalyst-free ring opening of azlactones in water microdroplets
Source: Royal Society of Chemistry journal article supplement (doi:10.1039/d4cc04487h), 2024-01-01

Supporting Information for

## Catalyst-Free Ring Opening of Azlactones in Water Microdroplets<sup>†‡</sup>

Kumar Naveen,<sup>a,§</sup> Vishesh Singh Rawat,<sup>a,§</sup> Rahul Verma<sup>a</sup> and Elumalai Gnanamani<sup>\*a</sup>

Department of Chemistry, Indian Institute of Technology Roorkee, Roorkee 247667, India

\*Corresponding author. Email: [gnanam@cy.iitr.ac.in](mailto:gnanam@cy.iitr.ac.in)

### Table of contents

| Entry |                                                                     | Page No. |
|-------|---------------------------------------------------------------------|----------|
| 1     | General information                                                 | S2       |
| 2     | Optimization of reaction conditions                                 | S3       |
| 3     | Reaction in Bulk phase: <i>Control experiment</i>                   | S3       |
| 4     | Microdroplet synthesis of <i>N</i> -benzoyl derivatives <b>2a-g</b> | S4       |
| 5     | Synthesis of dipeptide <b>3a</b>                                    | S7       |
| 6     | HPLC chromatogram of racemic and chiral dipeptide <b>3a</b>         | S8       |
| 7     | Crystallographic data                                               | S10      |
| 8     | References                                                          | S15      |
| 9     | NMR spectra                                                         | S16      |
| 10    | Polarimeter data                                                    | S21      |
| 11    | MS and MS <sup>2</sup> data of <b>2a</b>                            | S24      |

## 1. General information

All the amino acids were purchased from Avra synthesis Pvt. Ltd., India and used without further purification. All the solvents were purchased from Merck, India and distilled using standard procedures.<sup>1a</sup> For the microdroplet spray used, the fused silica gel capillary for transfer of solution to the spray source (i.d. of 100  $\mu\text{m}$  and o.d. of 360  $\mu\text{m}$  from Ploymicro Technologies, Az, USA). TLC plate was performed on pre-coated 0.25 mm thick aluminium-backed silica gel plates purchased from Merck KGaA, Germany, and visualized with a UV lamp ( $\lambda = 254$  nm) or ninhydrin stain. Flash chromatography was performed on Merck silica gel (230-400 mesh). Single crystal X-ray diffraction analysis (SC-XRD) analysis was performed on the Bruker D8 Quest model. <sup>1</sup>H-NMR and <sup>13</sup>C-NMR spectra were recorded on JEOL ECZ500R/S1 instrument. All proton NMR chemical shifts are reported in ppm relative to tetramethylsilane (0.00 ppm) or the residual solvent peak (Chloroform-*d*  $\delta$  7.26 ppm and DMSO-*d*<sub>6</sub>  $\delta$  2.50). Multiplets are abbreviated as follows: s = singlet, d = doublet, t = triplet, q = quartet, m = multiplet. <sup>13</sup>C NMR spectra were recorded at 126 MHz, and data are reported as follows: a chemical shift in ppm from tetramethylsilane with the solvent as an internal indicator (Chloroform-*d*  $\delta$  77.16 ppm and DMSO-*d*<sub>6</sub>  $\delta$  39.52). HRMS data were obtained in ESI mode by Agilent LC/Q-TOF instrument. Optical rotations were measured in an Rudolph Polarimeter AUTOPOL-V PLUS. The polarimeter optical rotation is consistent with that reported in the literature.<sup>2-4</sup> Enantiomeric excesses of the sample were determined on an Agilent HPLC instrument using the Dacel chiralpak columns (AD-H). All the azlactones (**1a-1e**) were prepared according to reported procedures, and the proton NMR data is consistent with that reported in the literature.<sup>1b&c</sup>

## 2. Optimization of reaction conditions:

### General procedure I:

Az lactone ( $\pm$ -**1a**) was dissolved in a water-ACN or water-dioxane, or water-acetone solvent (1 mL, 1:1) and the solution loaded into an airtight glass syringe. The solution was delivered with a syringe pump (NE-300, New Era Pump Systems, Inc. Farmingdale, NY, USA) at a flow rate of 30  $\mu$ L/min. to a fused silica gel glass capillary (i.d. of 100  $\mu$ m and o.d. of 360  $\mu$ m, capillary length: 20 cm). Dry nitrogen, which served as the sheath gas, was operated at 120 psi pressure or, as mentioned in Table S1. The distance between spray source and collecting surface kept as 40 mm. The microdroplets were sprayed for 33.3 minutes and collected. The collected crude material was then assayed by crude  $^1\text{H}$  NMR to assess the conversion and purified through flash column chromatography (95:5 $\rightarrow$ 80:20,  $\text{CH}_2\text{Cl}_2/\text{MeOH}$ ), afforded the title compound racemic *N*-benzoyl alanine (**2a**). **Table S1**: Optimization of reaction conditions.<sup>a</sup>

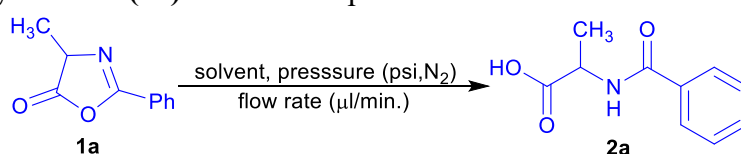

| Entry | Solvent ratio (1:1)       | Pressure (psi) | Flow rate ( $\mu\text{L}/\text{min.}$ ) | Concentration ( $\text{mol L}^{-1}$ ) | Conversion <sup>b</sup> (%) | Yield (%) <sup>c</sup> |
|-------|---------------------------|----------------|-----------------------------------------|---------------------------------------|-----------------------------|------------------------|
| 1     | H <sub>2</sub> O: Dioxane | 120            | 30                                      | 0.15                                  | 45                          | 31                     |
| 2     | H <sub>2</sub> O: Acetone | 120            | 30                                      | 0.15                                  | 100                         | 82                     |
| 3     | H <sub>2</sub> O: ACN     | 120            | 30                                      | 0.15                                  | 100                         | 90                     |
| 4     | H <sub>2</sub> O: ACN     | 120            | 50                                      | 0.1                                   | 64                          | 56                     |
| 5     | H <sub>2</sub> O: ACN     | 120            | 30                                      | 0.1                                   | 100                         | 94                     |
| 6     | H <sub>2</sub> O: ACN     | 120            | 30                                      | 0.2                                   | 38                          | 30                     |
| 7     | H <sub>2</sub> O: ACN     | 50             | 30                                      | 0.1                                   | 42                          | 36                     |
| 8     | H <sub>2</sub> O: ACN     | 0              | 30                                      | 0.1                                   | n.d.                        | n.d.                   |

<sup>a</sup>All reactions were performed with *rac*-4-methyl-2-phenyloxazol-5(4*H*)-one for 33.3 minutes.

<sup>b</sup>Conversion was determined by crude  $^1\text{H}$  NMR analysis. <sup>c</sup>Yields of isolated products. n.d. = not detected.

## 3. Reaction in Bulk phase: Control experiment:

A 5 mL glass vial was charged with azlactone ( $\pm$ -**1a**) (0.1 mmol) and dissolved in 1 mL of water-acetonitrile (v:v = 1:1). The resulting mixture was stirred at room temperature for 6 hours and the organic solvent was evaporated *in vacuo*, and the reaction mixture was extracted with ethyl acetate (3 $\times$ 3 mL). The organic extracts were combined and dried over  $\text{MgSO}_4$ , and the organic solvent was concentrated *in vacuo* to afford corresponding crude ( $\pm$ -)**2a**. To determine the conversion, the crude sample was analyzed by using  $^1\text{H}$  NMR and desired *N*-benzoyl alanine (**2a**) was not observed.

## 4. Microdroplet synthesis of *N*-benzoyl derivatives (**2a-g**):

### General procedure II

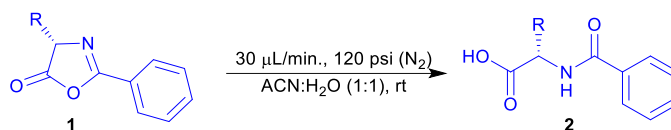

0.1 mmol of azlactone (**1**) was dissolved in a water-acetonitrile in 1 mL of water/acetonitrile solvent (v:v = 1:1), and the solution was loaded into an airtight glass syringe. The solution was delivered with a syringe pump (NE-300, New Era Pump Systems, Inc. Farmingdale, NY, USA) at a flow rate of 30 μL/min to a fused silica gel capillary (i.d. of 100 μm and o.d. of 360 μm, capillary length: 20 cm). The end of the capillary was equipped with a sheath-gas-assisted spray emitter. Dry nitrogen, which served as the sheath gas, was operated at 120 psi. The distance between spray source and collecting surface kept as 40 mm. The microdroplets were sprayed for 33.3 minutes and collected. The collected crude material was purified through flash column chromatography to afford the corresponding *N*-benzoyl amino acid (**2**).

### *N*-benzoyl-*L*-alanine (**2a**)

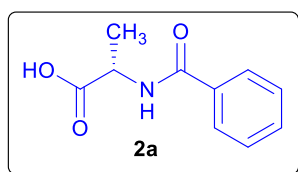

The title compound was prepared according to the general procedure II, using (*S*)-4-methyl-2-phenyloxazol-5(4*H*)-one **1a** (17.5 mg, 0.1 mmol). The crude product was subjected to flash column chromatography (95:5→80:20, CH<sub>2</sub>Cl<sub>2</sub>/MeOH), afforded the title compound **2a** as a white solid (18.2 mg, 94% yield). The structure of the compound was determined by using <sup>1</sup>H NMR data.

**<sup>1</sup>H NMR (DMSO-*d*<sub>6</sub>, 400 MHz):** δ 8.67 (d, *J* = 7.3 Hz, 1H), 7.88 (m, 2H), 7.52 (m, 1H), 7.47 (m, 2H), 4.42 (qn, *J* = 7.3 Hz, 1H), 1.39 (d, *J* = 7.3 Hz, 3H). The <sup>1</sup>H NMR data is consistent with that reported in the literature.<sup>2</sup>

**HRMS:** Calculated for C<sub>10</sub>H<sub>10</sub>NO<sub>3</sub><sup>-</sup>[M-H] 192.0666, found 192.0670.

**[α]<sub>D</sub><sup>22</sup>:** +24.1° (*c* 1.0, CHCl<sub>3</sub>), lit. **[α]<sub>D</sub><sup>22</sup>:** +29.1° (*c* 1.0, CHCl<sub>3</sub>)<sup>3</sup>

### *N*-benzoyl-*L*-valine (**2b**)

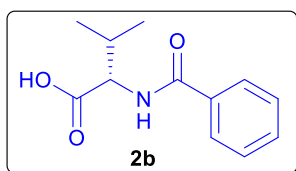

The title compound was prepared according to the general procedure II, using (*S*)-4-isopropyl-2-phenyloxazol-5(4*H*)-one **1b** (20.3 mg, 0.1 mmol). The crude product was subjected to flash column chromatography (95:5→85:15 CH<sub>2</sub>Cl<sub>2</sub>/MeOH), afforded the title compound **2b** as a white solid (17.9 mg, 81% yield). The structure of the compound was determined by using <sup>1</sup>H NMR data.

**<sup>1</sup>H NMR (DMSO-*d*<sub>6</sub>, 400 MHz):** δ 8.41 (d, *J* = 8.1 Hz, 1H), 7.91 – 7.84 (m, 2H), 7.56 – 7.50 (m, 1H), 7.49 – 7.44 (m, 2H), 4.29 (t, *J* = 7.6 Hz, 1H), 2.31 – 2.11 (m, 1H), 0.97 (t, *J* = 6.8 Hz, 6H). The <sup>1</sup>H NMR data is consistent with that reported in the literature.<sup>2</sup>

**[α]<sub>D</sub><sup>20</sup>:** +10.4 (*c* 1.09, MeOH), lit. **[α]<sub>D</sub><sup>20</sup>:** +10.0 (*c* 1.03, MeOH)<sup>2</sup>

### *N*-benzoyl-*L*-leucine (**2c**)

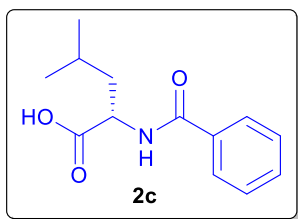

The title compound was prepared according to the general procedure II, using (*S*)-4-isobutyl-2-phenylloxazol-5(4*H*)-one **1c** (21.7 mg, 0.1 mmol). The crude product was subjected to flash column chromatography (95:5→85:15 CH<sub>2</sub>Cl<sub>2</sub>/MeOH), afforded the title compound **2c** as a light yellow solid (20 mg, 85% yield). The structure of the compound was determined by using <sup>1</sup>H NMR data.

**<sup>1</sup>H NMR (DMSO-*d*<sub>6</sub>, 400 MHz):** δ 8.57 (d, *J* = 8.0 Hz, 1H), 7.88 (d, *J* = 7.3 Hz, 2H), 7.53 (t, *J* = 7.3 Hz, 1H), 7.46 (t, *J* = 7.3 Hz, 2H), 4.44 (ddd, *J* = 10.8, 8.0, 4.3 Hz, 1H), 1.83 – 1.65 (m, 2H), 1.58 (ddd, *J* = 12.8, 8.8, 4.3 Hz, 1H), 0.91 (d, *J* = 6.4 Hz, 3H), 0.87 (d, *J* = 6.4 Hz, 3H). The <sup>1</sup>H NMR data is consistent with that reported in the literature.<sup>2</sup>

[α]<sub>D</sub><sup>22</sup>: –9.0 (*c* 1.08, MeOH), lit. [α]<sub>D</sub><sup>20</sup>: –12.8 (*c* 1.08, MeOH)<sup>2</sup>

### *N*-benzoyl-*L*-phenylalanine (**2d**)

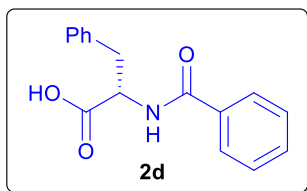

The title compound was prepared according to the general procedure II, using (*S*)-4-benzyl-2-phenylloxazol-5(4*H*)-one **1d** (17.5 mg, 0.1 mmol). The crude product was subjected to flash column chromatography (95:5→80:20 CH<sub>2</sub>Cl<sub>2</sub>/MeOH), afforded the title compound **2d** as a white solid (23.7 mg, 88% yield). The structure of the compound was determined by using <sup>1</sup>H NMR data.

**<sup>1</sup>H NMR (DMSO-*d*<sub>6</sub>, 400 MHz):** δ 8.59 (d, *J* = 8.1 Hz, 1H), 7.80 – 7.75 (m, 2H), 7.51 (t, *J* = 7.3 Hz, 1H), 7.44 (t, *J* = 7.6 Hz, 2H), 7.30 (d, *J* = 6.9 Hz, 2H), 7.24 (t, *J* = 7.6 Hz, 2H), 7.16 (t, *J* = 7.1 Hz, 1H), 4.59 (m, 1H), 3.21 (dd, *J* = 13.7, 4.3 Hz, 1H), 3.07 (dd, *J* = 13.7, 10.2 Hz, 1H). The <sup>1</sup>H NMR data is consistent with that reported in the literature.<sup>2</sup>

[α]<sub>D</sub><sup>20</sup>: –32.0 (*c* 1.09, MeOH), lit. [α]<sub>D</sub><sup>20</sup>: –31.4 (*c* 1.09, MeOH)<sup>2</sup>

### *N*-benzoyl-*L*-tryptophan (**2e**)

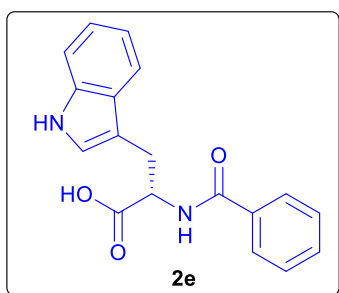

The title compound was prepared according to the general procedure II, using (*S*)-4-((1*H*-indol-3-yl)methyl)-2-phenylloxazol-5(4*H*)-one **1e** (29 mg, 0.1 mmol). The crude product was subjected to flash column chromatography (95:5→80:20 CH<sub>2</sub>Cl<sub>2</sub>/MeOH), afforded the title compound **2e** as a brown solid (24 mg, 78% yield).

**<sup>1</sup>H NMR (DMSO-*d*<sub>6</sub>, 400 MHz):** δ 10.82 (d, *J* = 2.5 Hz, 1H), 8.63 (d, *J* = 7.9 Hz, 1H), 7.82 (dd, *J* = 7.2, 1.7 Hz, 2H), 7.61 (d, *J* = 7.5 Hz, 1H), 7.52 (t, *J* = 7.3 Hz, 1H), 7.44 (t, *J* = 7.3 Hz, 2H), 7.33 (d, *J* = 7.9 Hz, 1H), 7.22 (d, *J* = 2.3 Hz, 1H), 7.06 (t, *J* = 7.3 Hz, 1H), 6.99 (t, *J* = 7.6 Hz, 1H), 4.67 (m, 1H), 3.33 (dd, *J* = 14.6, 4.6 Hz, 1H), 3.22 (dd, *J* = 14.6, 9.9 Hz, 1H). The <sup>1</sup>H NMR data is consistent with that reported in the literature.<sup>2</sup>

**HRMS:** Calculated for C<sub>18</sub>H<sub>17</sub>N<sub>2</sub>O<sub>3</sub><sup>+</sup> [M+H] 309.1234, found 309.1240.

[α]<sub>D</sub><sup>20</sup>: –32.3 (*c* = 1.08, MeOH), lit. [α]<sub>D</sub><sup>20</sup>: –35.7 (*c* 1.08, MeOH)<sup>2</sup>

### ***N*-benzoyl-*L*-tyrosine (2f)**

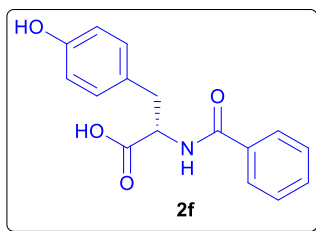

The title compound was prepared according to the general procedure II, using (*S*)-4-(4-hydroxybenzyl)-2-phenyloxazol-5(4*H*)-one **1f** (26.7 mg, 0.1 mmol). The crude product was subjected to flash column chromatography (95:5→80:20 CHCl<sub>3</sub>/MeOH), afforded the title compound **2d** as a white solid (21.4 mg, 75% yield). The structure of the compound was

determined by using <sup>1</sup>H NMR data.

**<sup>1</sup>H NMR (DMSO-*d*<sub>6</sub>, 500 MHz):** δ 9.21 (s, 1H), 8.62 (d, *J* = 8.0 Hz, 1H), 7.79 (d, *J* = 8.6 Hz, 2H), 7.52 (t, *J* = 7.3 Hz, 1H), 7.45 (t, *J* = 7.4 Hz, 2H), 7.10 (d, *J* = 8.6 Hz, 2H), 6.64 (d, *J* = 8.6 Hz, 2H), 4.52 (ddd, *J* = 10.5, 8.0, 4.5 Hz, 1H), 3.06 (dd, *J* = 13.8, 4.5 Hz, 1H), 2.94 (dd, *J* = 13.8, 10.5 Hz, 1H). The <sup>1</sup>H NMR data is consistent with that reported in the literature.<sup>4</sup>

[α]<sub>D</sub><sup>25</sup>: -33.4 (*c* 1.00, MeOH), lit. [α]<sub>D</sub><sup>23</sup>: -36.0 (*c* 1.1, MeOH)<sup>4</sup>

### ***N*-benzoyl-*L*-methionine (2g)**

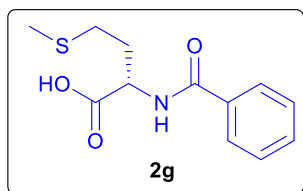

The title compound was prepared according to the general procedure II, using (*S*)-4-(2-(methylthio)ethyl)-2-phenyloxazol-5(4*H*)-one **1g** (23.5 mg, 0.1 mmol). The crude product was subjected to flash column chromatography (95:5→85:15 CH<sub>2</sub>Cl<sub>2</sub>/MeOH), afforded the title compound **2g** as a white solid (20.2 mg, 80% yield). The

structure of the compound was determined by using <sup>1</sup>H NMR data.

**<sup>1</sup>H NMR (DMSO-*d*<sub>6</sub>, 500 MHz):** δ 8.64 (d, *J* = 7.8 Hz, 1H), 7.88 (d, *J* = 7.0 Hz, 2H), 7.59 – 7.50 (m, 1H), 7.48 (t, *J* = 7.3 Hz, 2H), 4.58 – 4.47 (m, 1H), 2.65 – 2.49 (m, 2H), 2.12 – 2.04 (m, 2H), 2.05 (s, 3H). The <sup>1</sup>H NMR data is consistent with that reported in the literature.<sup>2</sup>

[α]<sub>D</sub><sup>25</sup>: -14.5° (*c* 1.00, MeOH), lit. [α]<sub>D</sub><sup>20</sup>: -21.0 (*c* 1.03, MeOH)<sup>2</sup>

## 5. Synthesis of dipeptide **3a**:<sup>5a</sup>

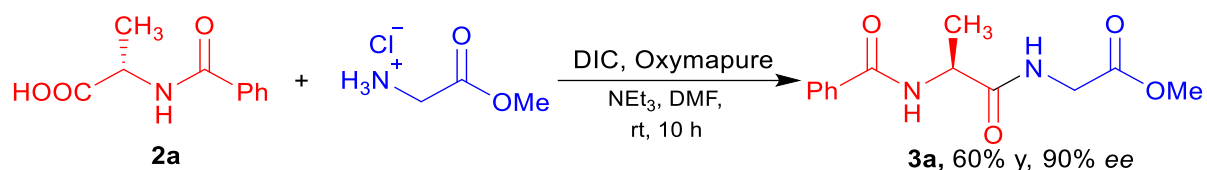

In a 25 mL round bottom flask charged with benzoyl-*L*-alanine (19.3 mg, 0.1 mmol), methyl glycinate hydrochloride (12.5 mg, 0.1 mmol), oxymapure (0.11 mmol., 1.1 equiv.), and DMF (2 ml) at room temperature in a nitrogen atmosphere. DIC (18.9 mg, 0.15 mmol, 1.5 equiv.) and NEt<sub>3</sub> (3.0 equiv.) were added to the reaction mixture at room temperature and stirred for 10 h. Quenched the reaction mixture with cold water and extracted with dichloromethane (3×5 ml), dried over anhydrous Na<sub>2</sub>SO<sub>4</sub> and concentrated. The crude product was purified by column chromatography (CH<sub>2</sub>Cl<sub>2</sub>: MeOH = 40:1), afforded the title compound (*S*)-**3a** as a white solid (15.8 mg, 60% yield). For HPLC analysis, the racemic sample of **3a** has been synthesised from racemic **2a**.

**<sup>1</sup>H NMR (CDCl<sub>3</sub>, 500 MHz):** δ 7.80 (d, *J* = 8.3 Hz, 2H), 7.58 – 7.42 (m, 2H), 7.43 – 7.30 (m, 3H), 4.83 (qn, *J* = 7.1 Hz, 1H), 4.01 (d, *J* = 4.7 Hz, 2H), 3.69 (s, 3H), 1.47 (d, *J* = 6.9 Hz, 3H).

**<sup>13</sup>C NMR (CDCl<sub>3</sub>, 126 MHz):** δ 173.2, 170.3, 167.5, 133.7, 131.9, 128.6, 127.5, 52.4, 49.1, 41.3, 18.4. The NMR data is consistent with that reported in the literature.<sup>5a</sup>

**HRMS:** Calculated for C<sub>13</sub>H<sub>17</sub>N<sub>2</sub>O<sub>4</sub><sup>+</sup> [M+H] 265.1183, found 265.1187.

**HPLC:** 90% *ee* (95:5 *er*) (Daicel CHIRALPAK AD-H, Hexane:*i*PrOH (90:10) 1.0 mL/min; *T*<sub>major</sub> = 19.6 min, *T*<sub>minor</sub> = 12.8 min, 254 nm absorbance)

**[α]<sub>D</sub><sup>25</sup>:** –23.7 (*c* 1.00, CHCl<sub>3</sub>)

## 6. HPLC chromatogram of racemic and chiral dipeptide **3a**

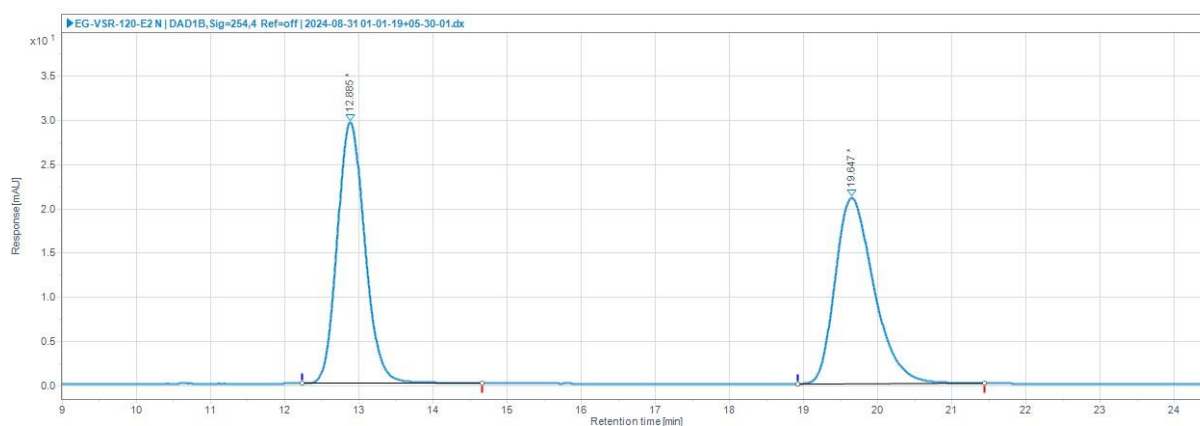

Signal: DAD1B, Sig=254,4 Ref=off

| Name | Peak Retention Time | Area     | Area% | Height     |
|------|---------------------|----------|-------|------------|
|      | 12.885              | 12821282 | 50.06 | 4946854.90 |
|      | 19.647              | 12788340 | 49.94 | 3516759.59 |

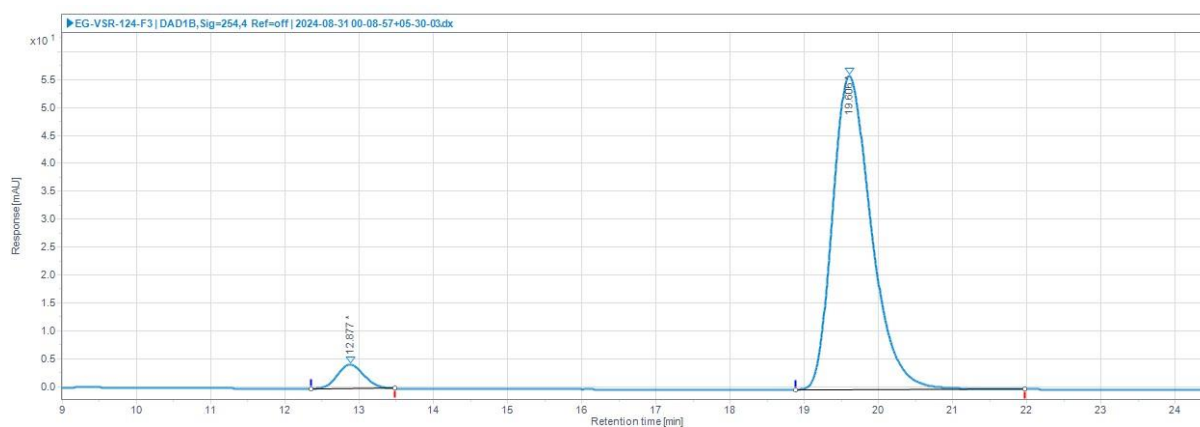

Signal: DAD1B, Sig=254,4 Ref=off

| Name | Peak Retention Time | Area     | Area% | Height     |
|------|---------------------|----------|-------|------------|
|      | 12.877              | 1801156  | 5.00  | 716442.20  |
|      | 19.606              | 34222462 | 95.00 | 9428735.54 |



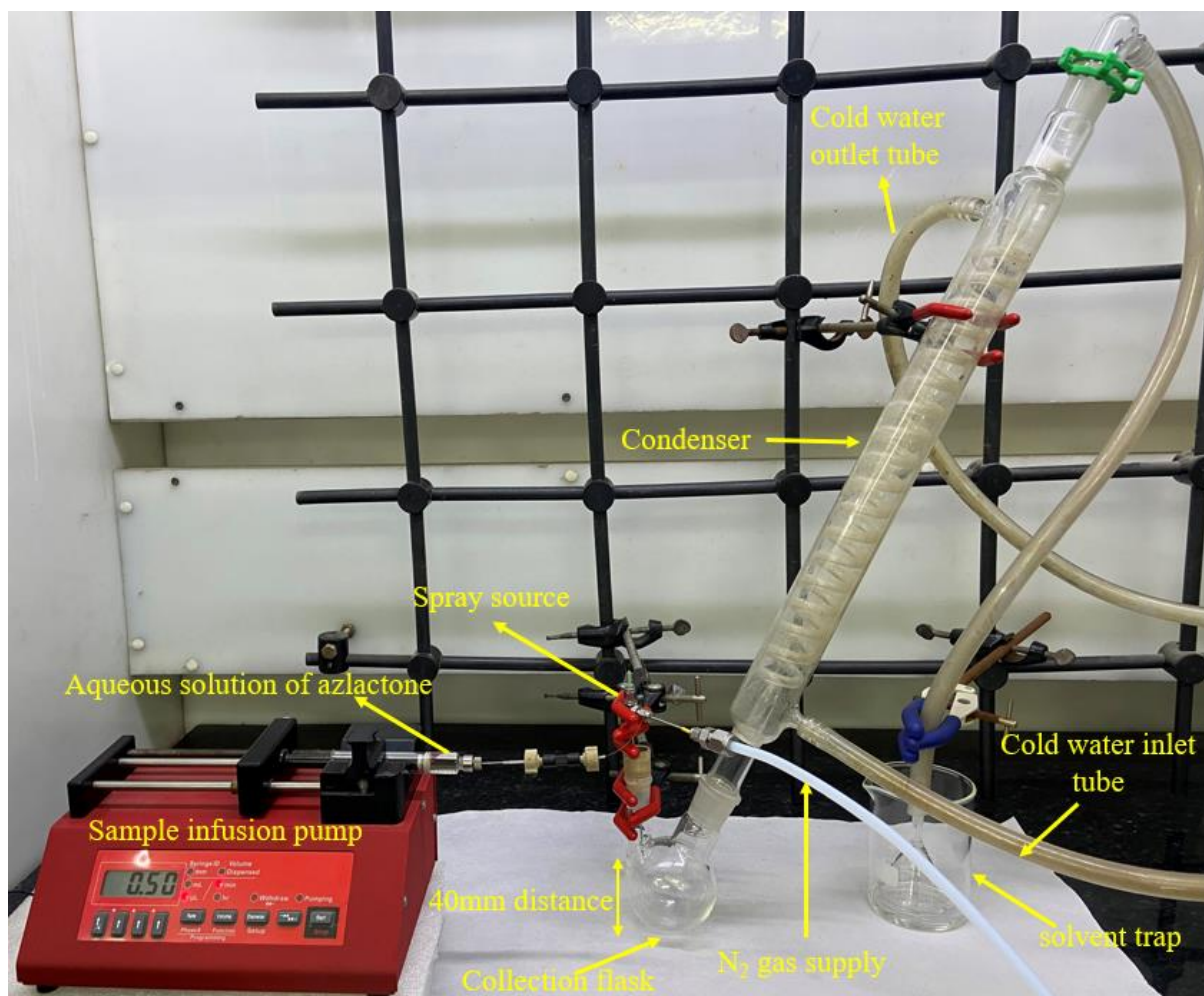

**Figure S1:** A picture of the experimental setup for the collection of the sprayed microdroplets in a round bottom flask (100 ml), connected to a condenser and solvent trap. The reaction duration calculated based on applied pressure, and the distance between spray source and collecting surface (40 mm). The calculated reaction duration found to be 483  $\mu\text{s}$  (less than 0.5 ms).<sup>5b</sup>

## 7. X-ray crystallographic data:

**Table S2.** Crystal data and structure refinement of product **3a**<sup>6</sup>

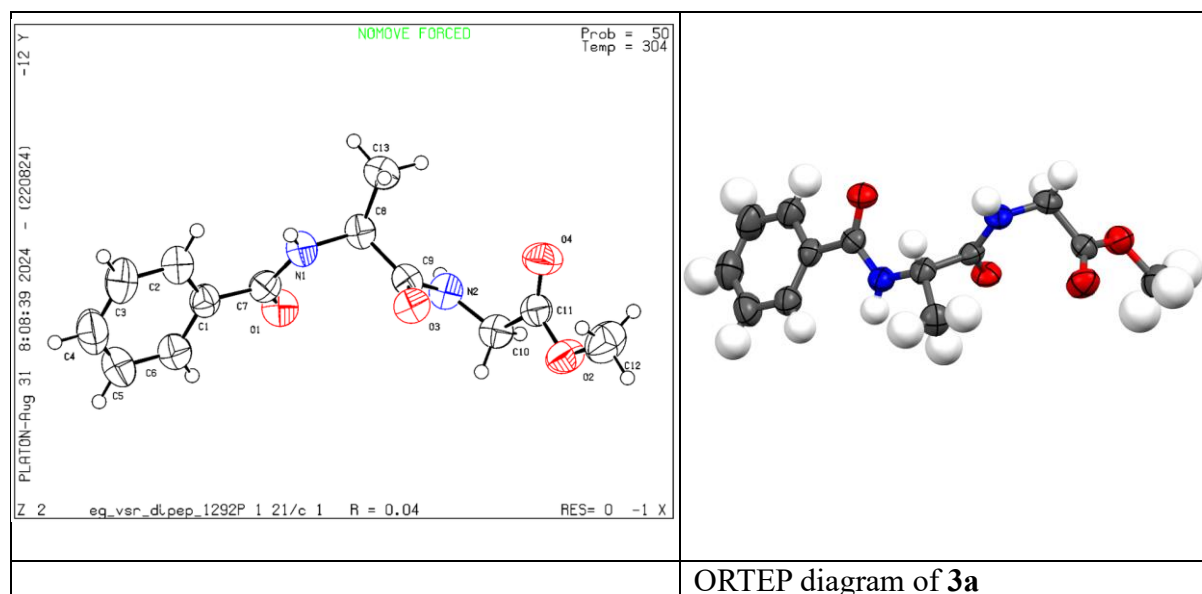

|                                    |                                                               |
|------------------------------------|---------------------------------------------------------------|
| Identification code                | EG_VSR_DIPEP_1292_0ma_a                                       |
| Empirical formula                  | C <sub>13</sub> H <sub>16</sub> N <sub>2</sub> O <sub>4</sub> |
| Formula weight                     | 264.28                                                        |
| Temperature/K                      | 304.0                                                         |
| Crystal system                     | monoclinic                                                    |
| Space group                        | P2 <sub>1</sub> /c                                            |
| a/Å                                | 13.5013(11)                                                   |
| b/Å                                | 11.4480(10)                                                   |
| c/Å                                | 9.0667(8)                                                     |
| α/°                                | 90                                                            |
| β/°                                | 100.556(4)                                                    |
| γ/°                                | 90                                                            |
| Volume/Å <sup>3</sup>              | 1377.7(2)                                                     |
| Z                                  | 4                                                             |
| ρ <sub>calc</sub> /cm <sup>3</sup> | 1.274                                                         |
| μ/mm <sup>-1</sup>                 | 0.095                                                         |
| F(000)                             | 560.0                                                         |

|                                             |                                                               |
|---------------------------------------------|---------------------------------------------------------------|
| Crystal size/mm <sup>3</sup>                | 0.146 × 0.049 × 0.021                                         |
| Radiation                                   | MoK $\alpha$ ( $\lambda$ = 0.71073)                           |
| 2 $\Theta$ range for data collection/°      | 4.698 to 50.092                                               |
| Index ranges                                | -16 ≤ h ≤ 16, -13 ≤ k ≤ 13, -10 ≤ l ≤ 10                      |
| Reflections collected                       | 33644                                                         |
| Independent reflections                     | 2435 [R <sub>int</sub> = 0.0721, R <sub>sigma</sub> = 0.0336] |
| Data/restraints/parameters                  | 2435/0/174                                                    |
| Goodness-of-fit on F <sup>2</sup>           | 1.031                                                         |
| Final R indexes [I >= 2 $\sigma$ (I)]       | R <sub>1</sub> = 0.0398, wR <sub>2</sub> = 0.0862             |
| Final R indexes [all data]                  | R <sub>1</sub> = 0.0682, wR <sub>2</sub> = 0.1037             |
| Largest diff. peak/hole / e Å <sup>-3</sup> | 0.14/-0.14                                                    |

**Table S3 Fractional Atomic Coordinates (×10<sup>4</sup>) and Equivalent Isotropic Displacement Parameters (Å<sup>2</sup>×10<sup>3</sup>) for EG\_VSR\_DIPEP\_1292\_0ma\_a. U<sub>eq</sub> is defined as 1/3 of the trace of the orthogonalised U<sub>ij</sub> tensor.**

| Atom | x           | y          | z          | U(eq)   |
|------|-------------|------------|------------|---------|
| O1   | 1878.1(10)  | 6571.2(12) | 1902.8(14) | 60.8(4) |
| O2   | 6612.7(11)  | 5882.5(12) | 5947.3(15) | 68.4(4) |
| O3   | 4029.3(10)  | 6740.6(11) | 5382.7(13) | 54.4(4) |
| O4   | 6175.0(12)  | 7749.0(13) | 5556.3(16) | 71.4(4) |
| N1   | 2173.0(11)  | 7742.5(14) | 3914.5(16) | 51.2(4) |
| N2   | 4614.7(12)  | 7027.9(14) | 3252.0(16) | 52.3(4) |
| C1   | 597.7(14)   | 6667.3(17) | 3380(2)    | 50.3(5) |
| C2   | 105.5(16)   | 7341.3(19) | 4287(2)    | 61.3(6) |
| C3   | -820.9(17)  | 7001(2)    | 4574(3)    | 78.2(7) |
| C4   | -1263.5(18) | 5989(3)    | 3962(3)    | 85.6(8) |
| C5   | -787.8(19)  | 5322(2)    | 3060(3)    | 83.3(7) |
| C6   | 139.4(16)   | 5658.8(19) | 2756(2)    | 67.3(6) |
| C7   | 1597.8(14)  | 6986.2(16) | 3015(2)    | 48.4(5) |
| C8   | 3142.1(14)  | 8120.1(16) | 3607(2)    | 50.4(5) |

|     |            |            |            |         |
|-----|------------|------------|------------|---------|
| C9  | 3953.6(14) | 7220.0(16) | 4149.4(19) | 46.4(5) |
| C10 | 5478.7(15) | 6295.3(17) | 3744(2)    | 53.4(5) |
| C11 | 6111.4(14) | 6747.7(18) | 5168(2)    | 50.6(5) |
| C12 | 7257.4(19) | 6202(2)    | 7353(3)    | 86.2(8) |
| C13 | 3451.0(16) | 9274.3(17) | 4388(2)    | 67.4(6) |

**Table S4 Anisotropic Displacement Parameters ( $\text{\AA}^2 \times 10^3$ ) for EG\_VSR\_DIPEP\_1292\_0ma\_a. The Anisotropic displacement factor exponent takes the form:  $-2\pi^2[h^2a^{*2}U_{11}+2hka^*b^*U_{12}+\dots]$ .**

| Atom | $U_{11}$ | $U_{22}$ | $U_{33}$ | $U_{23}$ | $U_{13}$  | $U_{12}$  |
|------|----------|----------|----------|----------|-----------|-----------|
| O1   | 67.5(9)  | 69.6(9)  | 47.0(8)  | -4.6(7)  | 15.2(7)   | 0.4(7)    |
| O2   | 76(1)    | 59.6(9)  | 64.8(9)  | -2.3(7)  | 0.1(8)    | 13.3(8)   |
| O3   | 67.1(9)  | 62.4(8)  | 35.9(7)  | 5.1(6)   | 15.0(6)   | 2.7(7)    |
| O4   | 85.1(11) | 51.6(9)  | 72(1)    | -4.6(8)  | 0.1(8)    | -2.0(8)   |
| N1   | 49.6(10) | 63.6(10) | 41.7(8)  | -2.4(8)  | 11.9(7)   | -3.6(8)   |
| N2   | 57.6(10) | 66.3(11) | 34.7(8)  | 3.5(7)   | 13.3(8)   | 1.8(8)    |
| C1   | 46.2(11) | 57.6(12) | 44.7(10) | 6.6(9)   | 2.2(9)    | 0(1)      |
| C2   | 53.0(13) | 73.5(14) | 57.3(12) | -1.2(11) | 9.7(10)   | -2.3(11)  |
| C3   | 53.9(14) | 107(2)   | 76.7(16) | 1.4(14)  | 18.6(12)  | 3.1(14)   |
| C4   | 52.0(15) | 106(2)   | 97.8(19) | 10.4(17) | 10.3(14)  | -11.2(15) |
| C5   | 60.6(16) | 79.8(17) | 104(2)   | -4.7(15) | 1.8(14)   | -16.9(13) |
| C6   | 58.2(14) | 66.3(14) | 75.1(15) | -4.4(12) | 6.0(11)   | -2.1(11)  |
| C7   | 51.7(12) | 52.2(11) | 40.2(10) | 6.2(9)   | 5.2(9)    | 4.2(9)    |
| C8   | 48.4(12) | 61.5(13) | 41.7(10) | 3.9(9)   | 9.7(9)    | -4.3(10)  |
| C9   | 50.0(12) | 53.5(11) | 36(1)    | -5.3(9)  | 8.9(9)    | -7.5(9)   |
| C10  | 59.9(13) | 57.8(12) | 45.6(11) | -3.6(9)  | 17.8(10)  | 0.9(10)   |
| C11  | 50.7(12) | 53.1(13) | 51.2(11) | 1.5(10)  | 17.9(9)   | 0.9(10)   |
| C12  | 86.4(18) | 91.7(18) | 70.0(15) | -3.2(13) | -13.3(13) | 19.3(14)  |
| C13  | 66.7(14) | 55.2(13) | 79.5(15) | 4.1(11)  | 11.4(12)  | -5.8(11)  |

**Table S5 Bond Lengths for EG\_VSR\_DIPEP\_1292\_0ma\_a.**

| Atom | Atom | Length/Å | Atom | Atom | Length/Å |
|------|------|----------|------|------|----------|
| O1   | C7   | 1.235(2) | C1   | C6   | 1.381(3) |
| O2   | C11  | 1.328(2) | C1   | C7   | 1.493(3) |
| O2   | C12  | 1.452(3) | C2   | C3   | 1.379(3) |
| O3   | C9   | 1.233(2) | C3   | C4   | 1.373(3) |
| O4   | C11  | 1.198(2) | C4   | C5   | 1.363(3) |
| N1   | C7   | 1.337(2) | C5   | C6   | 1.385(3) |
| N1   | C8   | 1.453(2) | C8   | C9   | 1.519(3) |
| N2   | C9   | 1.332(2) | C8   | C13  | 1.521(3) |
| N2   | C10  | 1.440(2) | C10  | C11  | 1.504(3) |
| C1   | C2   | 1.384(3) |      |      |          |

**Table S6 Bond Angles for EG\_VSR\_DIPEP\_1292\_0ma\_a.**

| Atom | Atom | Atom | Angle/°    | Atom | Atom | Atom | Angle/°    |
|------|------|------|------------|------|------|------|------------|
| C11  | O2   | C12  | 116.35(16) | O1   | C7   | C1   | 120.78(18) |
| C7   | N1   | C8   | 121.24(15) | N1   | C7   | C1   | 118.09(17) |
| C9   | N2   | C10  | 120.18(15) | N1   | C8   | C9   | 110.95(15) |
| C2   | C1   | C7   | 123.22(18) | N1   | C8   | C13  | 110.42(16) |
| C6   | C1   | C2   | 118.81(19) | C9   | C8   | C13  | 108.59(15) |
| C6   | C1   | C7   | 117.96(18) | O3   | C9   | N2   | 121.81(17) |
| C3   | C2   | C1   | 120.4(2)   | O3   | C9   | C8   | 122.06(16) |
| C4   | C3   | C2   | 120.3(2)   | N2   | C9   | C8   | 116.02(16) |
| C5   | C4   | C3   | 119.8(2)   | N2   | C10  | C11  | 111.47(15) |
| C4   | C5   | C6   | 120.4(2)   | O2   | C11  | C10  | 110.73(17) |
| C1   | C6   | C5   | 120.3(2)   | O4   | C11  | O2   | 123.77(19) |
| O1   | C7   | N1   | 121.13(18) | O4   | C11  | C10  | 125.50(19) |

**Table S7 Hydrogen Atom Coordinates (Å×10<sup>4</sup>) and Isotropic Displacement Parameters (Å<sup>2</sup>×10<sup>3</sup>) for EG\_VSR\_DIPEP\_1292\_0ma\_a.**

| Atom | <i>x</i> | <i>y</i> | <i>z</i> | U(eq) |
|------|----------|----------|----------|-------|
| H1   | 1965.48  | 8010.59  | 4690.2   | 61    |
| H2   | 4525.29  | 7342.32  | 2376.19  | 63    |
| H2A  | 401.01   | 8027.3   | 4706.58  | 74    |
| H3   | -1147.42 | 7459.9   | 5183.49  | 94    |
| H4   | -1886.03 | 5759.35  | 4163.1   | 103   |
| H5   | -1087.51 | 4636.29  | 2646.37  | 100   |
| H6   | 454.74   | 5203.93  | 2128.08  | 81    |
| H8   | 3087.96  | 8224.72  | 2522.23  | 60    |
| H10A | 5884.2   | 6261.66  | 2965.54  | 64    |
| H10B | 5254.98  | 5508.8   | 3909     | 64    |
| H12A | 7643.61  | 5534.85  | 7760.49  | 129   |
| H12B | 6849.63  | 6466.03  | 8050.08  | 129   |
| H12C | 7705.08  | 6817     | 7176.68  | 129   |
| H13A | 4101.93  | 9499.52  | 4201.9   | 101   |
| H13B | 3479.61  | 9187.34  | 5447.86  | 101   |
| H13C | 2966.26  | 9864.65  | 4006.48  | 101   |

## Experimental

Single crystals of C<sub>13</sub>H<sub>16</sub>N<sub>2</sub>O<sub>4</sub> [EG\_VSR\_DIPEP\_1292\_0ma\_a] were [ ]. A suitable crystal was selected and [ ] on a 'Bruker APEX-II CCD' diffractometer. The crystal was kept at 304.0 K during data collection. Using Olex<sup>7</sup>, the structure was solved with the XT<sup>8</sup> structure solution program using Intrinsic Phasing and refined with the XL<sup>9</sup> refinement package using Least Squares minimisation.

## Crystal structure determination of [EG\_VSR\_DIPEP\_1292\_0ma\_a]

**Crystal Data** for C<sub>13</sub>H<sub>16</sub>N<sub>2</sub>O<sub>4</sub> (*M* = 264.28 g/mol): monoclinic, space group P2<sub>1</sub>/c (no. 14), *a* = 13.5013(11) Å, *b* = 11.4480(10) Å, *c* = 9.0667(8) Å, *β* = 100.556(4)°, *V* = 1377.7(2) Å<sup>3</sup>, *Z* = 4, *T* = 304.0 K, *μ*(MoKα) = 0.095 mm<sup>-1</sup>, *D*<sub>calc</sub> = 1.274 g/cm<sup>3</sup>, 33644 reflections measured (4.698° ≤ 2θ ≤ 50.092°), 2435 unique (*R*<sub>int</sub> = 0.0721, *R*<sub>sigma</sub> = 0.0336) which were used in all calculations. The final *R*<sub>1</sub> was 0.0398 (*I* > 2σ(*I*)) and *wR*<sub>2</sub> was 0.1037 (all data).

## 8. References:

1. (a) Armarego, W. L. F; Chai, C. L. L. purification of Laboratory Chemicals, 6<sup>th</sup> ed.; Elsevier, UK, 2009. (b) C. Macovei, P. Vicennati, J. Quinton, M.-C. Nevers, H. Volland, C. Créminon and F. Taran, *Chem. Commun.*, 2012, **48**, 4411. (c) S. Dong, X. Liu, Y. Zhu, P. He, L. Lin and X. Feng, *J. Am. Chem. Soc.*, 2013, **135**, 10026–10029.
2. E. D. Gómez and H. Duddeck, *Magn. Reson. Chem.*, 2009, **47**, 222–227.
3. D. Enders, *Turk. J. Chem.*, 2013, **37**, 492-518.
4. Z. Hu, Q. An, K. Li, Y. Zhang, J. Qiu, B. Xu, W. Pan, P. Cao, C. Liu, Z. Huang, W. Xia and G. Liang, *Org. Process Res. Dev.*, 2013, **17**, 1156–1167.
5. (a) W. Xiong, G. Lai and W. H. Liu, *Chem. Eur. J.*, 2024, **30**, e202401619. (b) J. K. Lee, S. Kim, H. G. Nam and R. N. Zare, *Proc. Natl. Acad. Sci. U. S.A.* 2015, **112**, 3898.
6. Detailed X-ray crystallographic data (CCDC No.2380911) are available from the Cambridge Crystallographic Data Centre, 12 Union Road, Cambridge, CB2 1EZ, UK
7. O. V. Dolomanov, L. J. Bourhis, R. J. Gildea, J. A. K. Howard, H. Puschmann, *J. Appl. Cryst.* 2009, **42**, 339-341.
8. G. M. Sheldrick, *Acta Cryst.* 2015, *A71*, 3-8.
9. G. M. Sheldrick, *Acta Cryst.* 2015, *C71*, 3-8.

## 9. NMR Spectra:

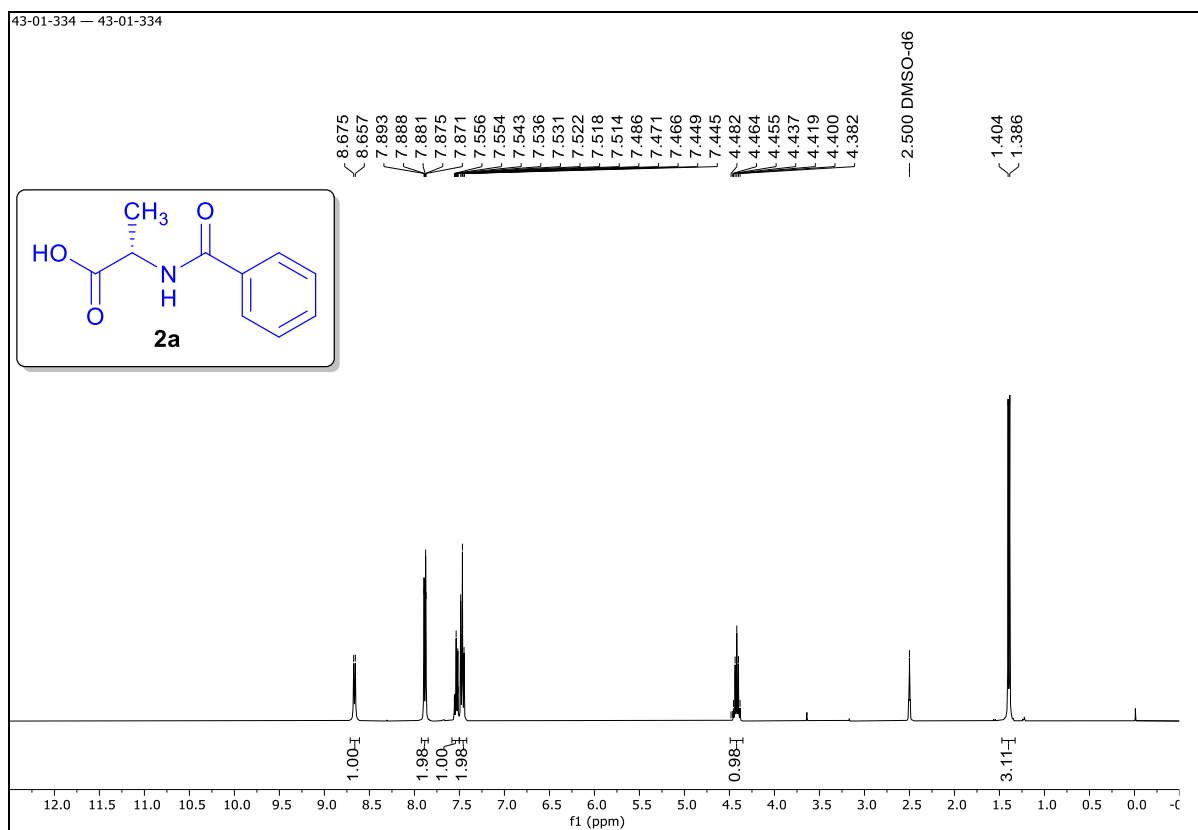

$^1\text{H}$  NMR spectrum of *N*-benzoyl-L-alanine (**2a**)

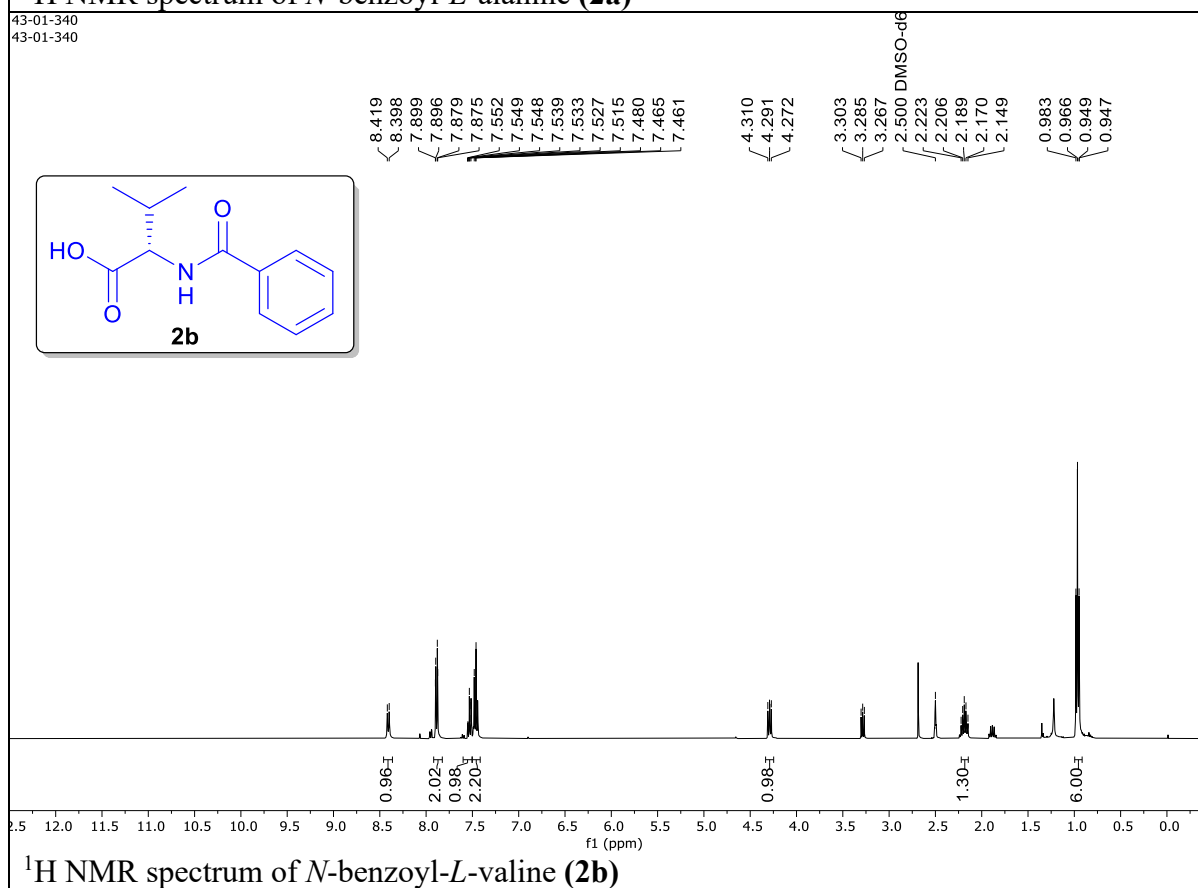

$^1\text{H}$  NMR spectrum of *N*-benzoyl-L-valine (**2b**)



43-01-335 — 43-01-335

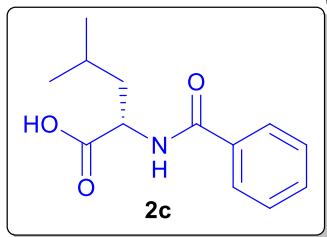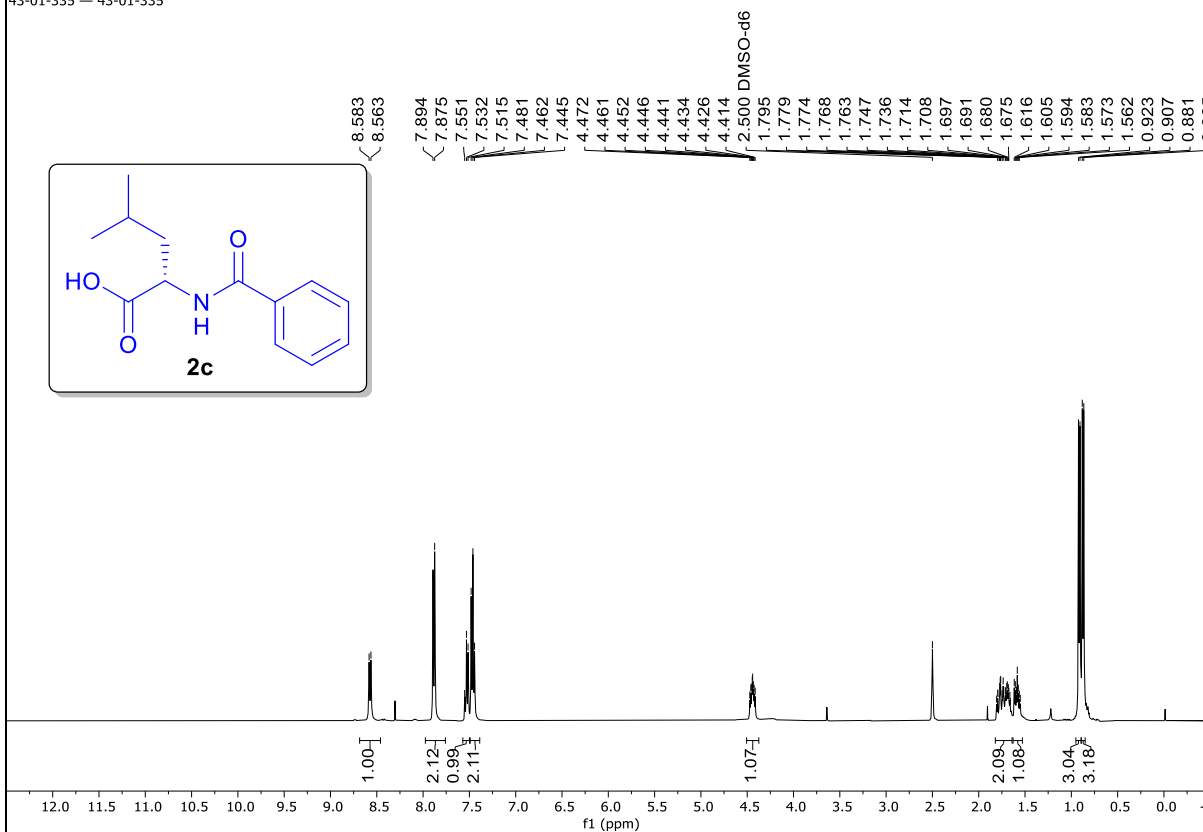

<sup>1</sup>H NMR spectrum of *N*-benzoyl-*L*-leucine (**2c**)

43-01-337 — 43-01-337

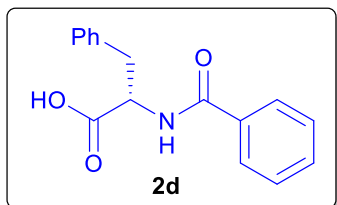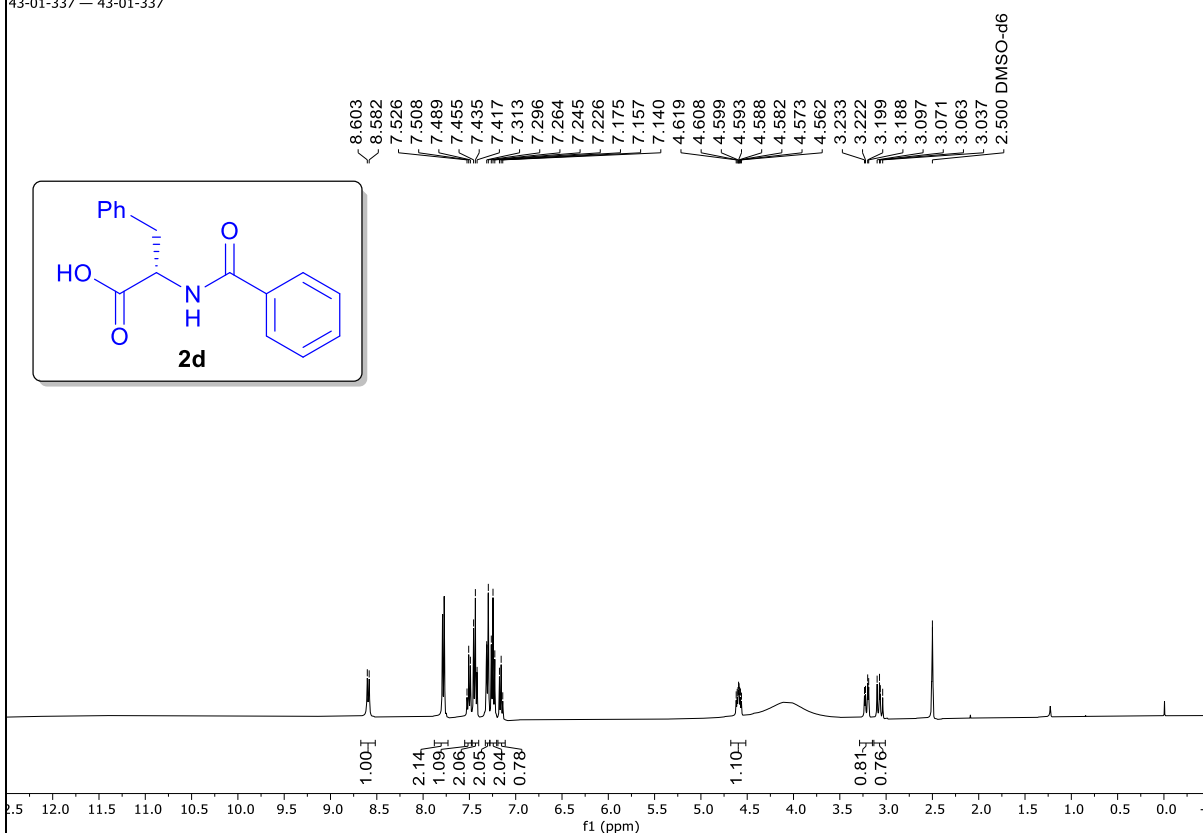

<sup>1</sup>H NMR spectrum of *N*-benzoyl-*L*-phenylalanine (**2d**)

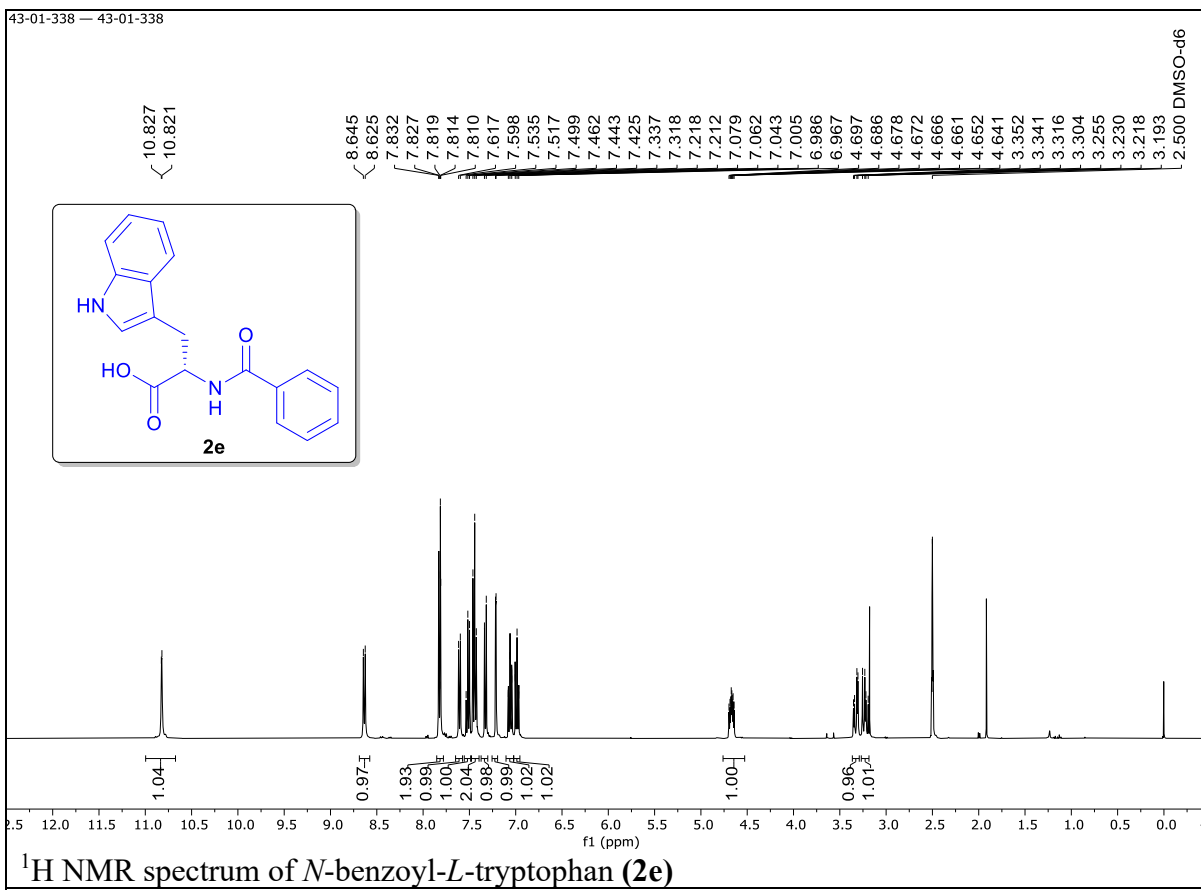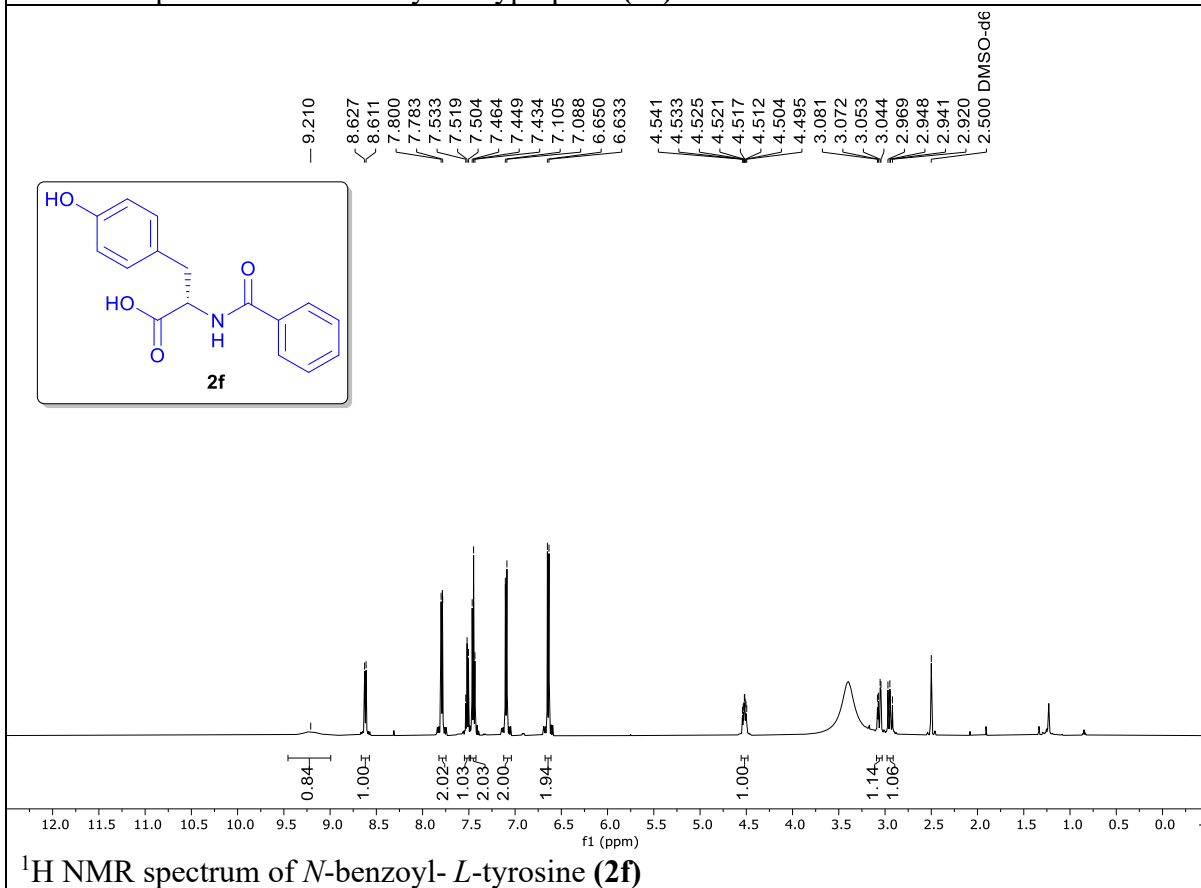

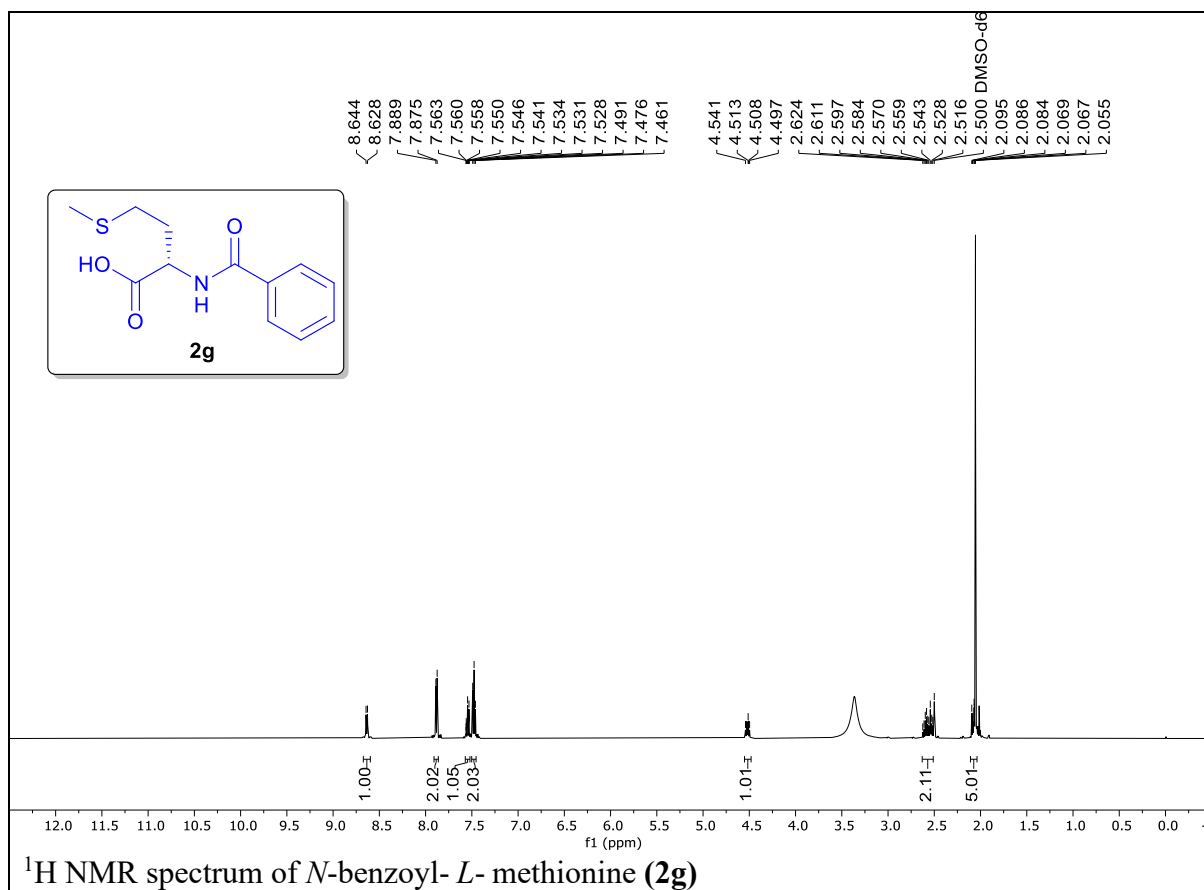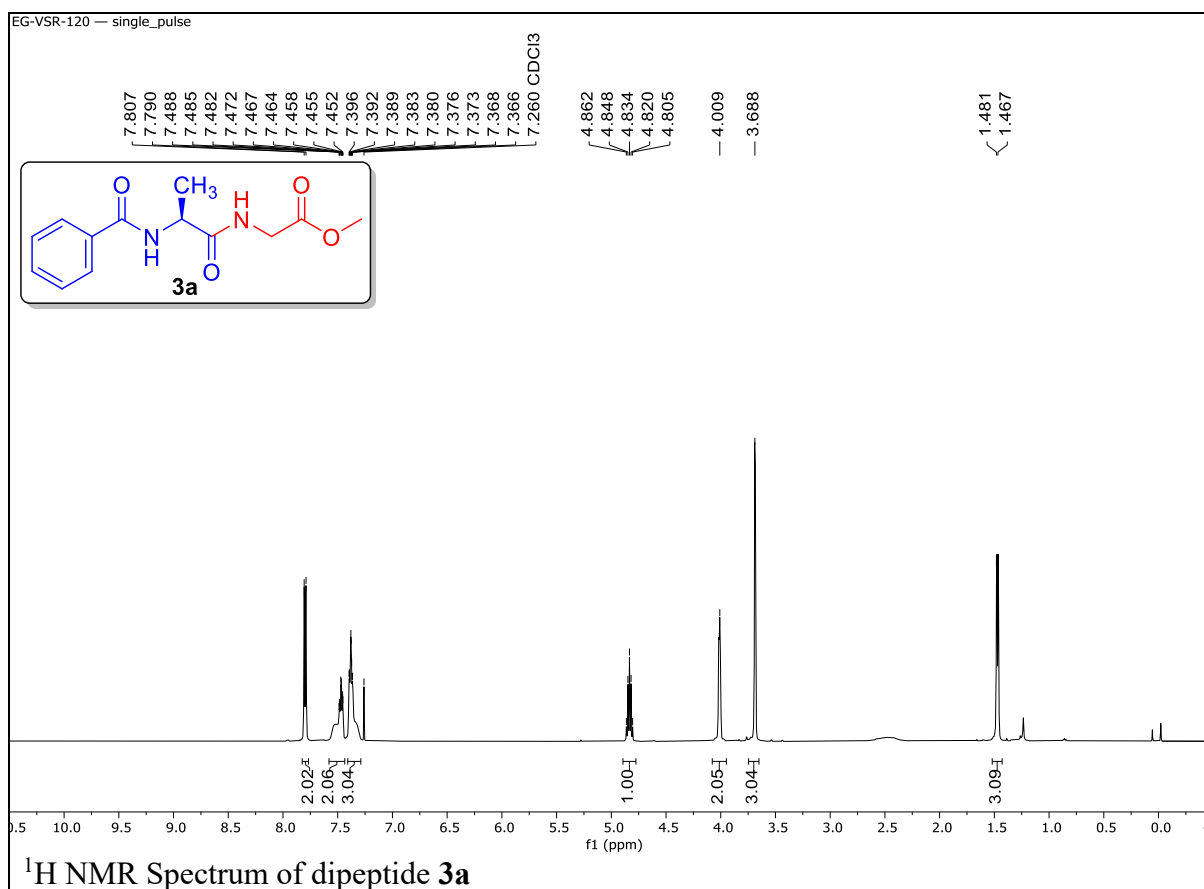

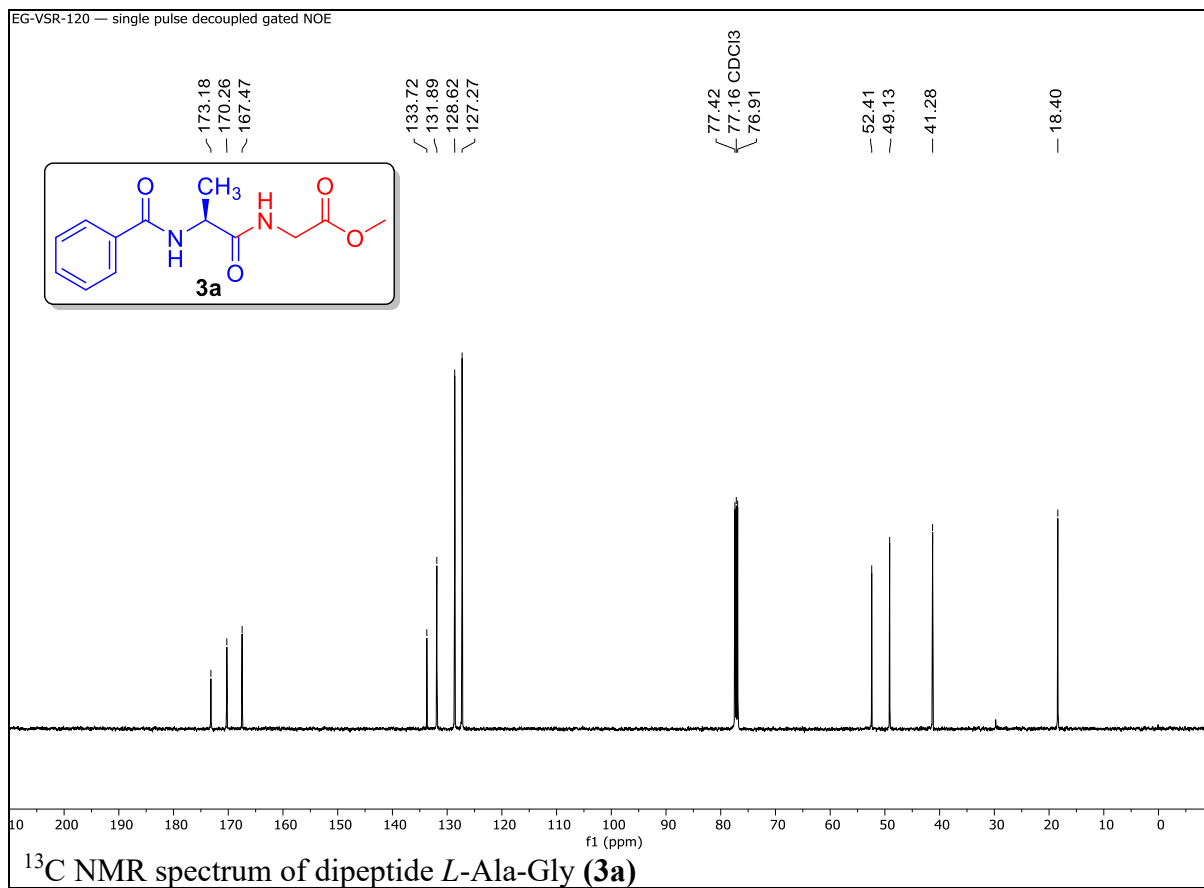

## 10. Polarimeter data of chiral 2 and 3a:

|                                                                                                                                             |                  |                                                                                                        |               |              |                |            |              |             |  |  |
|---------------------------------------------------------------------------------------------------------------------------------------------|------------------|--------------------------------------------------------------------------------------------------------|---------------|--------------|----------------|------------|--------------|-------------|--|--|
| IIT Roorkee<br>Thursday, 30-AUG-2024                                                                                                        |                  | 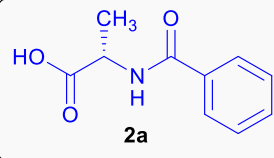 <p><b>2a</b></p>   |               |              |                |            |              |             |  |  |
| This sample was measured on an <u>Autopol V Plus</u> , Serial #85232<br>Manufactured by Rudolph Research Analytical, Hackettstown, NJ, USA. |                  |                                                                                                        |               |              |                |            |              |             |  |  |
| Set Temperature : 22.0<br>Temperature Correction : Sucrose                                                                                  |                  |                                                                                                        |               |              |                |            |              |             |  |  |
| n                                                                                                                                           | Average          | Std.Dev.                                                                                               | Maximum       | Minimum      |                |            |              |             |  |  |
| 5                                                                                                                                           | 24.056           | 0.5128                                                                                                 | 23.869        | 23.247       |                |            |              |             |  |  |
| <u>S.No</u>                                                                                                                                 | <u>Sample ID</u> | <u>Time</u>                                                                                            | <u>Result</u> | <u>Scale</u> | <u>OR °Arc</u> | <u>WLG</u> | <u>Conc.</u> | <u>Temp</u> |  |  |
| 1                                                                                                                                           | N-Bz-Ala         | 03:33:35 PM                                                                                            | 24.771        | SR           | 0.247          | 589        | 1.000        | 22.4        |  |  |
| 2                                                                                                                                           | N-Bz-Ala         | 03:33:46 PM                                                                                            | 24.393        | SR           | 0.243          | 589        | 1.000        | 22.4        |  |  |
| 3                                                                                                                                           | N-Bz-Ala         | 03:33:57 PM                                                                                            | 24.001        | SR           | 0.240          | 589        | 1.000        | 22.3        |  |  |
| 4                                                                                                                                           | N-Bz-Ala         | 03:34:08 PM                                                                                            | 23.247        | SR           | 0.232          | 589        | 1.000        | 22.3        |  |  |
| 5                                                                                                                                           | N-Bz-Ala         | 03:34:19 PM                                                                                            | 23.869        | SR           | 0.238          | 589        | 1.000        | 22.3        |  |  |
| IIT Roorkee<br>Thursday, 29-AUG-2024                                                                                                        |                  |  <p><b>2b</b></p>  |               |              |                |            |              |             |  |  |
| This sample was measured on an <u>Autopol V Plus</u> , Serial #85232<br>Manufactured by Rudolph Research Analytical, Hackettstown, NJ, USA. |                  |                                                                                                        |               |              |                |            |              |             |  |  |
| Set Temperature : 20.0<br>Temperature Correction : Sucrose                                                                                  |                  |                                                                                                        |               |              |                |            |              |             |  |  |
| n                                                                                                                                           | Average          | Std.Dev.                                                                                               | Maximum       | Minimum      |                |            |              |             |  |  |
| 5                                                                                                                                           | 10.370           | 0.1208                                                                                                 | 10.555        | 10.267       |                |            |              |             |  |  |
| <u>S.No</u>                                                                                                                                 | <u>Sample ID</u> | <u>Time</u>                                                                                            | <u>Result</u> | <u>Scale</u> | <u>OR °Arc</u> | <u>WLG</u> | <u>Conc.</u> | <u>Temp</u> |  |  |
| 1                                                                                                                                           | N-Bz-Val         | 03:44:26 PM                                                                                            | 10.339        | SR           | 0.113          | 589        | 1.090        | 20.4        |  |  |
| 2                                                                                                                                           | N-Bz-Val         | 03:44:37 PM                                                                                            | 10.269        | SR           | 0.112          | 589        | 1.090        | 20.4        |  |  |
| 3                                                                                                                                           | N-Bz-Val         | 03:44:48 PM                                                                                            | 10.555        | SR           | 0.115          | 589        | 1.090        | 20.3        |  |  |
| 4                                                                                                                                           | N-Bz-Val         | 03:44:59 PM                                                                                            | 10.267        | SR           | 0.112          | 589        | 1.090        | 20.3        |  |  |
| 5                                                                                                                                           | N-Bz-Val         | 03:45:10 PM                                                                                            | 10.419        | SR           | 0.114          | 589        | 1.090        | 20.3        |  |  |
| IIT Roorkee<br>Thursday, 29-AUG-2024                                                                                                        |                  |  <p><b>2c</b></p> |               |              |                |            |              |             |  |  |
| This sample was measured on an <u>Autopol V Plus</u> , Serial #85232<br>Manufactured by Rudolph Research Analytical, Hackettstown, NJ, USA. |                  |                                                                                                        |               |              |                |            |              |             |  |  |
| Set Temperature : 22.0<br>Temperature Correction : Sucrose                                                                                  |                  |                                                                                                        |               |              |                |            |              |             |  |  |
| n                                                                                                                                           | Average          | Std.Dev.                                                                                               | Maximum       | Minimum      |                |            |              |             |  |  |
| 5                                                                                                                                           | -9.003           | 0.1995                                                                                                 | -9.197        | -8.700       |                |            |              |             |  |  |
| <u>S.No</u>                                                                                                                                 | <u>Sample ID</u> | <u>Time</u>                                                                                            | <u>Result</u> | <u>Scale</u> | <u>OR °Arc</u> | <u>WLG</u> | <u>Conc.</u> | <u>Temp</u> |  |  |
| 1                                                                                                                                           | N-Bz-Leu         | 04:05:52 PM                                                                                            | -9.197        | SR           | -0.099         | 589        | 1.080        | 22.0        |  |  |
| 2                                                                                                                                           | N-Bz-Leu         | 04:06:03 PM                                                                                            | -8.915        | SR           | -0.096         | 589        | 1.080        | 22.0        |  |  |
| 3                                                                                                                                           | N-Bz-Leu         | 04:06:14 PM                                                                                            | -9.065        | SR           | -0.098         | 589        | 1.080        | 22.1        |  |  |
| 4                                                                                                                                           | N-Bz-Leu         | 04:06:25 PM                                                                                            | -8.700        | SR           | -0.094         | 589        | 1.080        | 22.1        |  |  |
| 5                                                                                                                                           | N-Bz-Leu         | 04:06:36 PM                                                                                            | -9.138        | SR           | -0.099         | 589        | 1.080        | 22.1        |  |  |

IIT Roorkee  
Thursday, 29-AUG-2024

This sample was measured on an Autopol V Plus, Serial #85232  
Manufactured by Rudolph Research Analytical, Hackettstown, NJ, USA.

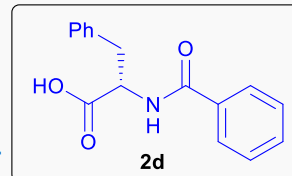

Set Temperature : 20.0  
Temperature Correction : Sucrose

| n | Average | Std.Dev. | Maximum | Minimum |
|---|---------|----------|---------|---------|
| 5 | -32.016 | 0.5289   | -32.671 | -31.247 |

| S.No | Sample ID  | Time        | Result  | Scale | OR °Arc | WLG | Conc. | Temp. |
|------|------------|-------------|---------|-------|---------|-----|-------|-------|
| 1    | N-Bz-PhAla | 03:33:35 PM | -32.671 | SR    | -0.356  | 589 | 1.090 | 20.4  |
| 2    | N-Bz-PhAla | 03:33:46 PM | -32.293 | SR    | -0.352  | 589 | 1.090 | 20.4  |
| 3    | N-Bz-PhAla | 03:33:57 PM | -32.001 | SR    | -0.349  | 589 | 1.090 | 20.3  |
| 4    | N-Bz-PhAla | 03:34:08 PM | -31.247 | SR    | -0.341  | 589 | 1.090 | 20.3  |
| 5    | N-Bz-PhAla | 03:34:19 PM | -31.869 | SR    | -0.347  | 589 | 1.090 | 20.3  |

IIT Roorkee  
Thursday, 29-AUG-2024

This sample was measured on an Autopol V Plus, Serial #85232  
Manufactured by Rudolph Research Analytical, Hackettstown, NJ, USA.

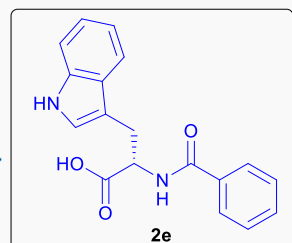

Set Temperature : 20.0  
Temperature Correction : Sucrose

| n | Average | Std.Dev. | Maximum | Minimum |
|---|---------|----------|---------|---------|
| 5 | -32.250 | 0.0909   | -32.363 | -32.116 |

| S.No | Sample ID | Time        | Result  | Scale | OR °Arc | WLG | Conc. | Temp. |
|------|-----------|-------------|---------|-------|---------|-----|-------|-------|
| 1    | N-Bz-Trp  | 03:24:56 PM | -32.225 | SR    | -0.348  | 589 | 1.080 | 20.4  |
| 2    | N-Bz-Trp  | 03:25:07 PM | -32.291 | SR    | -0.349  | 589 | 1.080 | 20.4  |
| 3    | N-Bz-Trp  | 03:25:18 PM | -32.363 | SR    | -0.350  | 589 | 1.080 | 20.3  |
| 4    | N-Bz-Trp  | 03:25:29 PM | -32.116 | SR    | -0.347  | 589 | 1.080 | 20.3  |
| 5    | N-Bz-Trp  | 03:25:40 PM | -32.253 | SR    | -0.348  | 589 | 1.080 | 20.2  |

IIT Roorkee  
Thursday, 10-OCT-2024

This sample was measured on an Autopol V Plus, Serial #85232  
Manufactured by Rudolph Research Analytical, Hackettstown, NJ, USA.

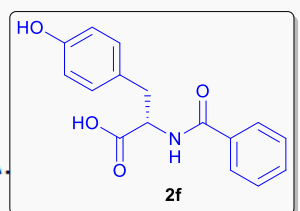

Set Temperature : 25.0  
Temperature Correction : Sucrose

| n | Average | Std.Dev. | Maximum | Minimum |
|---|---------|----------|---------|---------|
| 5 | -33.410 | 1.4177   | -35.775 | -32.324 |

| S.No | Sample ID | Time        | Result  | Scale | OR °Arc | WLG | Conc. | Temp. |
|------|-----------|-------------|---------|-------|---------|-----|-------|-------|
| 1    | N_Bz_Tyro | 11:00:39 AM | -32.999 | SR    | -0.330  | 589 | 1.000 | 25.4  |
| 2    | N_Bz_Tyro | 11:00:49 AM | -33.575 | SR    | -0.336  | 589 | 1.000 | 25.3  |
| 3    | N_Bz_Tyro | 11:01:00 AM | -35.775 | SR    | -0.358  | 589 | 1.000 | 25.3  |
| 4    | N_Bz_Tyro | 11:01:10 AM | -32.375 | SR    | -0.324  | 589 | 1.000 | 25.2  |
| 5    | N_Bz_Tyro | 11:01:20 AM | -32.324 | SR    | -0.323  | 589 | 1.000 | 25.2  |

IIT Roorkee  
Thursday, 10-OCT-2024

This sample was measured on an Autopol V Plus, Serial #85232  
Manufactured by Rudolph Research Analytical, Hackettstown, NJ, USA.

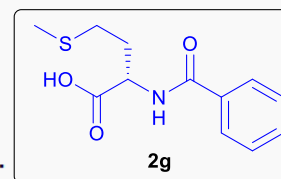

Set Temperature : 25.0  
Temperature Correction : Sucrose

| n | Average | Std.Dev. | Maximum | Minimum |
|---|---------|----------|---------|---------|
| 5 | -14.501 | 0.0635   | -14.562 | -14.410 |

| S.No | Sample ID        | Time        | Result  | Scale | OR °Arc | WLG | Conc. | Temp. |
|------|------------------|-------------|---------|-------|---------|-----|-------|-------|
| 1    | <u>N_BZ_Meth</u> | 10:48:53 AM | -14.486 | SR    | -0.145  | 589 | 1.000 | 25.2  |
| 2    | <u>N_BZ_Meth</u> | 10:49:04 AM | -14.562 | SR    | -0.146  | 589 | 1.000 | 25.2  |
| 3    | <u>N_BZ_Meth</u> | 10:49:14 AM | -14.562 | SR    | -0.146  | 589 | 1.000 | 25.2  |
| 4    | <u>N_BZ_Meth</u> | 10:49:24 AM | -14.487 | SR    | -0.145  | 589 | 1.000 | 25.1  |
| 5    | <u>N_BZ_Meth</u> | 10:49:34 AM | -14.410 | SR    | -0.144  | 589 | 1.000 | 25.1  |

IIT Roorkee  
Saturday, 31-AUG-2024

This sample was measured on an Autopol V Plus, Serial #85232  
Manufactured by Rudolph Research Analytical, Hackettstown, NJ, USA.

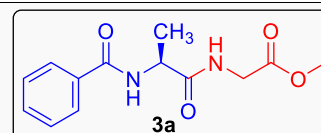

Set Temperature : 25.0  
Temperature Correction : Sucrose

| n | Average | Std.Dev. | Maximum | Minimum |
|---|---------|----------|---------|---------|
| 5 | -23.740 | 0.4370   | -24.209 | -23.168 |

| S.No | Sample ID       | Time        | Result  | Scale | OR °Arc | WLG | Conc. | Temp. |
|------|-----------------|-------------|---------|-------|---------|-----|-------|-------|
| 1    | Me BEZ-L-ALAGLY | 12:29:36 PM | -23.168 | SR    | -0.232  | 589 | 1.000 | 25.1  |
| 2    | Me BEZ-L-ALAGLY | 12:29:46 PM | -23.398 | SR    | -0.234  | 589 | 1.000 | 25.0  |
| 3    | Me BEZ-L-ALAGLY | 12:30:01 PM | -23.954 | SR    | -0.240  | 589 | 1.000 | 25.0  |
| 4    | Me BEZ-L-ALAGLY | 12:30:11 PM | -24.209 | SR    | -0.242  | 589 | 1.000 | 24.9  |
| 5    | Me BEZ-L-ALAGLY | 12:30:21 PM | -23.972 | SR    | -0.240  | 589 | 1.000 | 24.9  |

## 11. MS and MS<sup>2</sup> data of 2a:

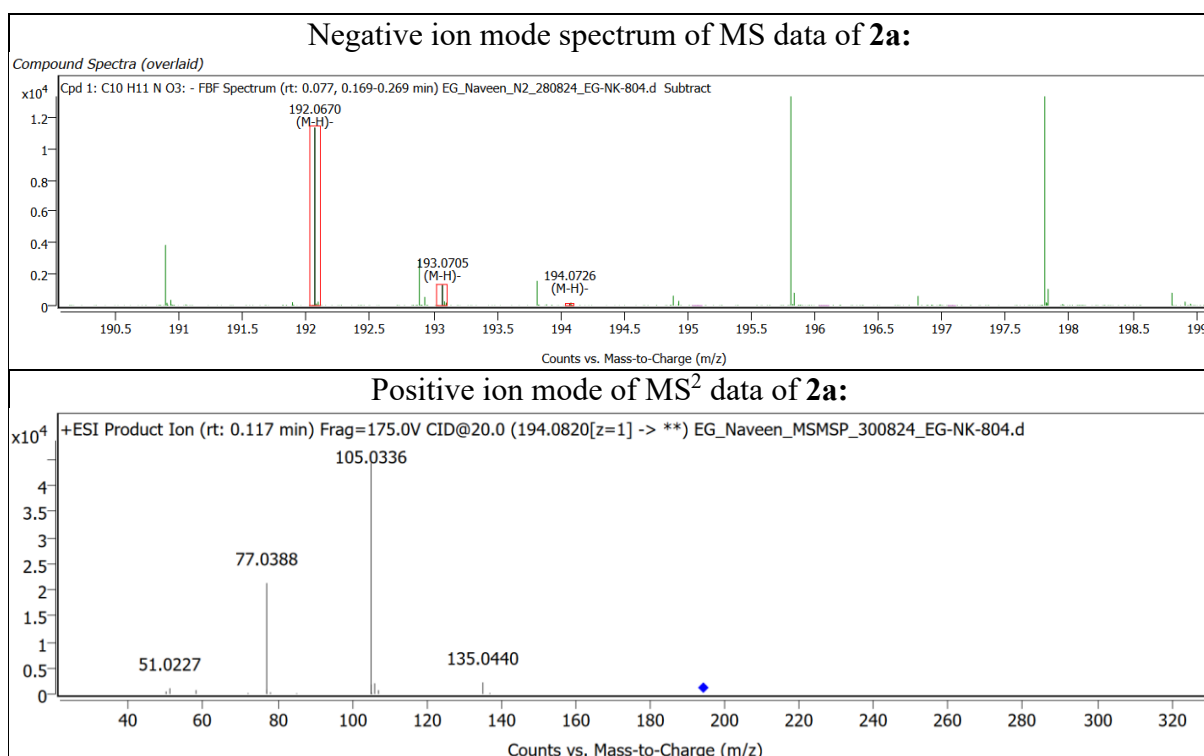

Supplement: d4cc04487h1.pdf [file d4cc04487h1.pdf]
